# Supplementary material for: Bypassing the Need for Cell Permeabilization: Nanobody CDR3 Peptide Improves Binding on Living Bacteria
Source: PubMed Central journal article supplement — Bioconjug Chem. 2023 Jul 7;34(7):1234–43. doi: 10.1021/acs.bioconjchem.3c00116 (PMC10360062; doi:10.1021/acs.bioconjchem.3c00116), 2023-07-07
Supplement: bc3c00116_si_002.pdf [file bc3c00116_si_002.pdf]

# Supporting Information

## **Bypassing the need for cell permeabilization: Nanobody CDR3 peptide improves binding on living bacteria**

A. Breine,<sup>2,3,§</sup> K. Van holsbeeck,<sup>1,§</sup> C. Martin,<sup>1</sup> S. Gonzalez,<sup>4</sup> M. Mannes,<sup>1</sup> E. Pardon,<sup>3</sup> J. Steyaert,<sup>3</sup> H. Remaut,<sup>3,5</sup> S. Ballet,<sup>1,\*</sup> C. Van der Henst<sup>2,3,\*</sup>

<sup>1</sup> Research Group of Organic Chemistry, Vrije Universiteit Brussel, Pleinlaan 2, 1050 Brussels, Belgium

<sup>2</sup> Microbial Resistance and Drug Discovery, VIB-VUB Center for Structural Biology, Pleinlaan 2, 1050 Brussels, Belgium

<sup>3</sup> Structural Biology Brussels, Vrije Universiteit Brussel, Pleinlaan 2, 1050 Brussels, Belgium

<sup>4</sup> CNRS, BioCIS, CY Cergy-Paris Université, 95000 Neuville sur Oise, France

<sup>5</sup> Structural and Molecular Microbiology, Structural Biology Research Center, VIB, 1050 Brussels, Belgium.

**\*Corresponding authors:** Charles.Van.Der.Henst@vub.be, Steven.Ballet@vub.be

## Table of Contents

|     |                                                           |    |
|-----|-----------------------------------------------------------|----|
| 1   | Supplementary figures .....                               | 3  |
| 1.1 | Nb CDR3 determination .....                               | 3  |
| 1.2 | Membrane interaction image analysis.....                  | 4  |
| 1.3 | Interaction of peptide 3 with <i>E. coli</i> .....        | 5  |
| 2   | Peptide syntheses and characterization .....              | 6  |
| 2.1 | General methods .....                                     | 6  |
| 2.2 | General SPPS protocols .....                              | 6  |
| 2.3 | Synthesis & characterization of linear peptides 1-3 ..... | 7  |
| 2.4 | Synthesis of cyclic peptide 6 .....                       | 9  |
| 2.5 | Synthesis of acetylated analogues.....                    | 11 |
| 2.6 | Copies of HPLC spectra.....                               | 13 |
| 2.7 | Proteolytic stability .....                               | 19 |
| 2.8 | Cytotoxicity on living <i>A. baumannii</i> cells .....    | 20 |
| 3   | Quantification labelled cells.....                        | 21 |
| 4   | References .....                                          | 22 |



## 1.2 Membrane interaction image analysis

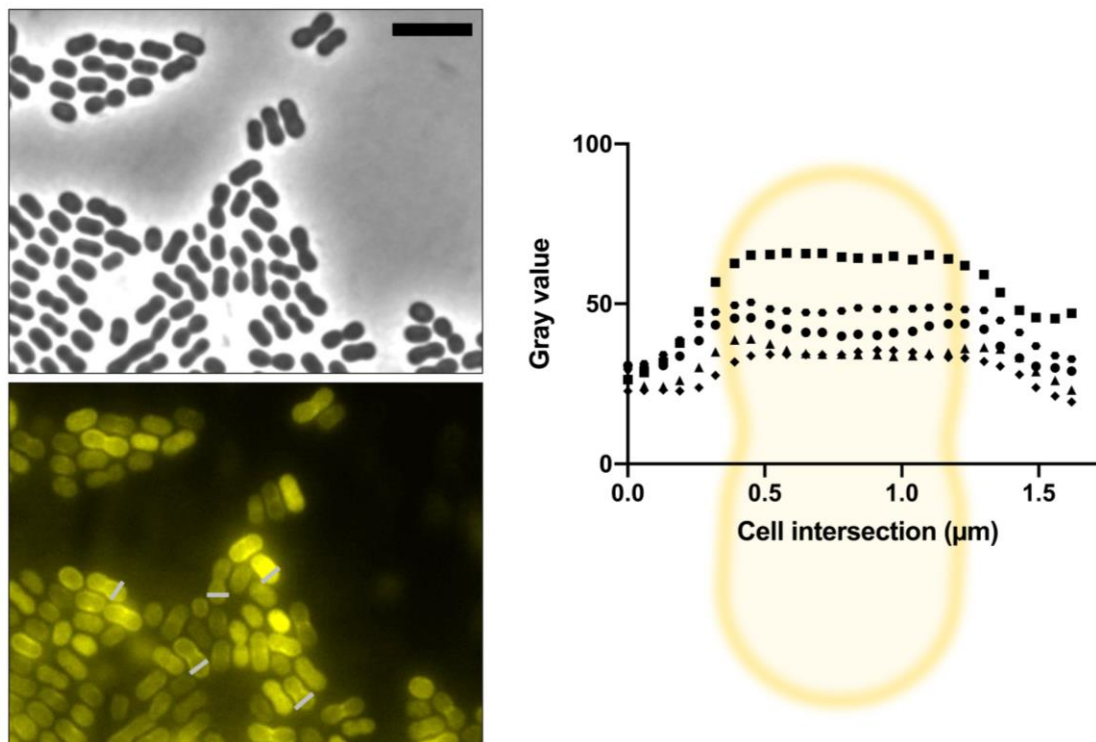

**Figure S2. Membrane interaction of NbD4 with fixed *A. baumannii* cells.** 5 bacterial cells of Figure 1A, indicated on the micrograph, were picked to illustrate the membrane labelling profile of NbD4. Scale bar is 5 μm.

### 1.3 Interaction of peptide 3 with *E. coli*

To test the interaction of peptide 3 with another Gram-negative bacterium, a clonal culture of *Escherichia coli* S17 was grown in the same conditions as the *A. baumannii* strains, normalized to OD<sub>600</sub>=3 in PBS and tested by fluorescence microscopy as was done for *A. baumannii*.

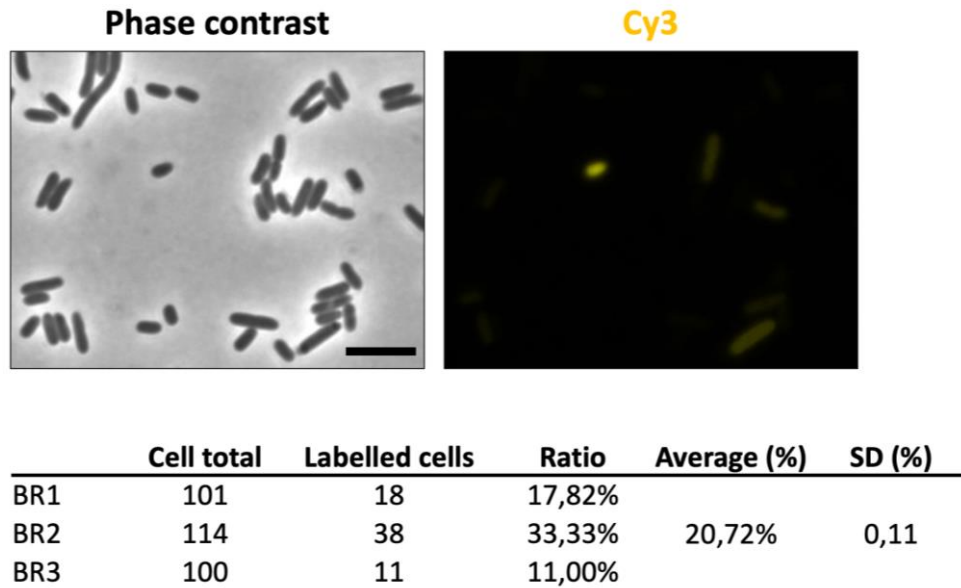

**Figure S3. Interaction of peptide 3 with another Gram-negative pathogen.** The specificity of peptide 3 was tested by assessing its binding abilities on *E. coli* S17 through fluorescence microscopy. Micrographs of the bacteria with phase contrast and the cy3-labelled peptide are shown. The percentage of labelled cells was calculated by counting the labelled cells found in min. 100 cells total. BR = Biological replicate. Scale bar is 5  $\mu$ m.

## 2 Peptide syntheses and characterization

### 2.1 General methods

Unless stated otherwise, all commercial chemicals were used without further purification. Fmoc-L-propargylglycine and *N,N,N',N'*-tetramethyl-O-(1H-benzotriazol-1-yl)uronium hexafluorophosphate (HBTU) were purchased from Carbosynth. Rink amide AM resin, Sieber amide resin and all remaining protected standard and unnatural amino acids were obtained from Chem-Impex. Sulfonylated Cyanine 3 (SulfoCy3) under its *N*-hydroxysuccinimide (NHS) ester form was obtained from Lumiprobe GmbH. All other reagents and solvents were purchased from Sigma Aldrich (Merck).

Preparative RP-HPLC was performed on a Gilson semi-preparative HPLC equipped with a Supelco Discovery BioWide Pore C18 column (250 mm x 21.2 mm, 10  $\mu$ m) and a UV detector set at 214 nm. The solvent system consisted of ultrapure water containing 0.1% TFA (A) and acetonitrile containing 0.1% TFA (B). The flow rate was set at 20 mL/min.

Analytical HPLC was performed using a VWR-Hitachi Chromaster HPLC equipped with a Chromolith High Resolution RP-18C column from Merck (150 mm x 4.6 mm, 1.1  $\mu$ m). Products were detected by a Chromaster HPLC 5430 diode array detector at a wavelength of 214 nm. The solvent system consisted of 0.1% TFA in ultrapure water (A) and 0.1% TFA in acetonitrile (B) with a linear gradient ranging from 1% to 99% B over 4.5 minutes at a flow rate of 2.8 mL/min.

HPLC-MS analyses were performed with a Waters 600 HPLC unit equipped with an EC 150/2 NUCLEODUR® 300-5 C18 column using a gradient ranging from 3% to 100% of acetonitrile containing 0.1% formic acid (C), in ultrapure water containing 0.1% formic acid (D), using a flow rate of 0.3 mL/min over 20 minutes. Monitoring was done via UV detection at 214 nm. Coupled MS analysis was performed on a Micromass QTOF-micro system. High resolution mass spectrometry (HRMS) spectra were recorded on the same MS system using a solution of reserpine (2  $\mu$ g/mL) in water:acetonitrile 1:1 as the reference.

### 2.2 General SPPS protocols

#### *General synthesis protocols*

Peptides were synthesized on a Rink Amide AM resin or Sieber amide resin on 0.10 mmol scales by iterative cycles of *N*<sup>t</sup>-Fmoc deprotection, amino acid couplings and washing steps, either in an automated fashion using a Liberty Lite™ Automated Microwave Peptide Synthesizer or manually to introduce the non-standard amino acids Fmoc-propargylglycine (Fmoc-Pra-OH) and Fmoc-azidolysine. Manual steps were carried out in polypropylene syringes equipped with a polyethylene frit. Amino acids were used in their *N*<sup>t</sup>-Fmoc-protected form, combined with the following side chain protecting groups: trityl (Trt) for Asn; *tert*-butyl (*t*Bu) for Ser, Thr, Tyr and Glu; *tert*-butyloxycarbonyl (Boc) for Lys and Trp; 2,2,4,6,7-pentamethylidihydrobenzofuran-5-sulfonyl (Pbf) for Arg.

On the Liberty Lite™ peptide synthesizer, couplings were performed using 4 equiv. of amino acids (0.5 M solution in DMF), *N,N'*-diisopropylcarbodiimide (DIC, 0.5 M solution in DMF), and Oxyma Pure (1 M solution in DMF). Whereas standard couplings were performed for 2.1 minutes at 90°C, Fmoc-Arg(Pbf)-OH was coupled twice at 75°C. Fmoc deprotections were carried out for 1.05 minutes at 90°C using 20 % (v/v) 4-methylpiperidine in DMF. Between every step, the resin was washed with DMF (3 times).

Manual syntheses were carried out in polypropylene syringes equipped with a polyethylene frit. Before use, the resin was swollen for 30 minutes in DMF. Between every step, the resin was washed thoroughly with DMF (3 times) and DCM (3 times). Fmoc deprotections were performed using 20 % (v/v) 4-methylpiperidine in DMF for 5 and 15 minutes. Amino acid residues were coupled using 3 equiv. of protected amino acid, 3 equiv. of *N,N,N',N'*-tetramethyl-O-(1H-benzotriazol-1-yl)uronium hexafluorophosphate (HBTU) and 6 equiv. of *N,N*-diisopropylethylamine (DIPEA) in DMF for 1 hour at room temperature. Completion of couplings was verified at all stages by Kaiser colorimetric tests.

### Standard peptide cleavages (Rink amide AM resin)

Peptide cleavages were performed with a freshly prepared cocktail of TFA/TIS/H<sub>2</sub>O 90/5/5 (v/v/v) for 2 h at room temperature, with an extension towards 4 h for the sequences containing a Pbf protecting group. Subsequently, the resin was filtered and washed with DCM and neat TFA. The combined filtrates were reduced in volume till ca. 1 mL under a stream of pressurized air, precipitated with 10 mL cold diethyl ether and centrifugated. After decantation of the supernatant, the crude white powder was again suspended in 10 mL cold diethyl ether, centrifugated and decanted (2 times). Subsequently, the crude peptides were dissolved in water, lyophilized, analyzed by analytical HPLC and HPLC-MS, and purified by preparative RP-HPLC.

### General protocol for fluorophore linkage on unprotected purified peptides

Purified unprotected peptide (1.0 equiv) was dissolved in 1 mL dimethylsulfoxide (DMSO) in a glass vial and sealed from light. Subsequently, sulfonated cyanine 3 NHS (1.1 equiv) was dissolved in 1 mL DMSO and added to the vial, followed by DIPEA (10 equiv). After full conversion of the starting peptide was observed in analytical RP-HPLC, the pink solution was directly purified by preparative RP-HPLC.

### Peptide purifications

Purifications were performed by preparative RP-HPLC using a linear gradient of acetonitrile containing 0.1% TFA (B) in water containing 0.1% TFA (A). The crude peptides were solubilized in DMSO. Fractions with an HPLC purity exceeding 95% were pooled and lyophilized, yielding the corresponding peptides under their TFA salt form.

## 2.3 Synthesis & characterization of linear peptides 1-3

### Synthesis & characterization of peptide 1

The peptide was assembled on a Sieber amide resin (0.6 mmol/g, 0.1 mmol) using the Liberty Lite™ peptide synthesizer, followed by cleavage of a side chain protected precursor (H-β-Ala-Gly-Ile-Ser(tBu)-Lys(Boc)-Ser(tBu)-Ile-Thr(tBu)-Ile-NH<sub>2</sub>) using 1% TFA in DCM (5 x 1 min). The combined filtrates were pooled and directly evaporated under reduced pressure. Given the high hydrophobicity of the protected peptide fragment, it was directly labelled. Therefore, sulfonated cyanine 3 NHS ester (1.0 equiv) was coupled to a small fraction of the obtained protected peptide (5.70 mg, 0.0078 mmol) by dissolving the in 0.8 mL DMSO:DCM 1:3 containing DIPEA (10 equiv). After overnight reaction, the side chain protecting groups were removed by stirring the peptide in a solution of TFA/TIS/H<sub>2</sub>O 90/5/5 (v/v/v) for 2 h at room temperature. After concentration *in vacuo*, the peptide was directly purified by preparative RP-HPLC using a linear gradient of 10 to 60% B in A, and peptide **1** was obtained under its TFA salt form after lyophilization as a pink powder (4.3 mg).

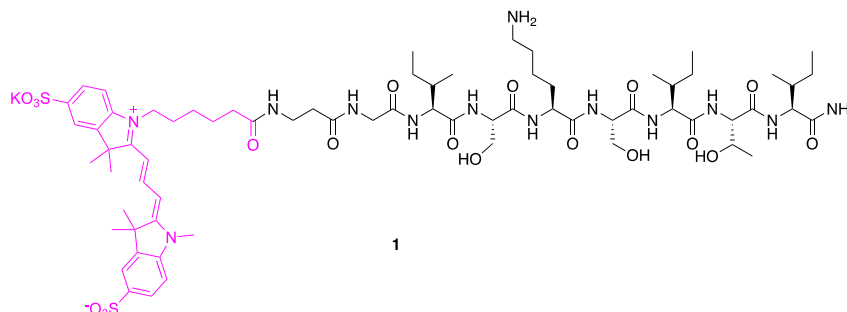

**Sequence:** SulfoCy3-β-Ala-Gly-Ile-Ser-Lys-Ser-Ile-Thr-Ile-NH<sub>2</sub>; **HPLC** (Chromolith RP-18C, 1-99% B in A over 4.5 min, flow rate = 2.8 mL/min, wavelength = 214 nm): **t<sub>R</sub>** = 2.73 min (> 99% purity); **HRMS (ESI+)** m/z calc. for C<sub>69</sub>H<sub>106</sub>N<sub>13</sub>O<sub>19</sub>S<sub>2</sub>Na [M+2H]<sup>2+</sup> = 754.8612, found 754.8577.

### Synthesis & characterization of peptide 2

The peptide was assembled on a Rink amide AM resin (0.64 mmol/g, 0.1 mmol) using the Liberty Lite™ peptide synthesizer, followed by isolation of the non-labelled precursor **7** (H-β-Ala-Thr-Ile-Thr-Ser-Gly-Gly-Thr-Thr-Asn-NH<sub>2</sub>) by the conditions outlined above. The non-labelled precursor **7** was purified by preparative RP-HPLC using a linear gradient of 1 to 30% B in A. After lyophilization, the peptide precursor **7** was obtained under its TFA salt form as a white powder in 6% yield (6.2 mg).

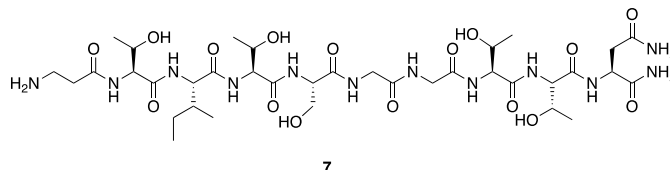

**Sequence:** H-β-Ala-Thr-Ile-Thr-Ser-Gly-Gly-Thr-Thr-Asn-NH<sub>2</sub>; **HPLC** (Chromolith RP-18C, 1-99% B in A over 4.5 min, flow rate = 2.8 mL/min, wavelength = 214 nm):  $t_R$  = 1.92 min (> 99% purity); **HRMS (ESI+)**  $m/z$  calc. for C<sub>36</sub>H<sub>64</sub>N<sub>12</sub>O<sub>16</sub> [M+H]<sup>+</sup> = 921.4642, found 921.4636.

Subsequently, peptide **7** (4 mg, 0.0043 mmol) was labelled using the procedure outlined above, and purified by preparative RP-HPLC using a linear gradient of 10 to 50% B in A. After lyophilization, peptide **2** was obtained as a pink powder in 83% yield (5.4 mg).

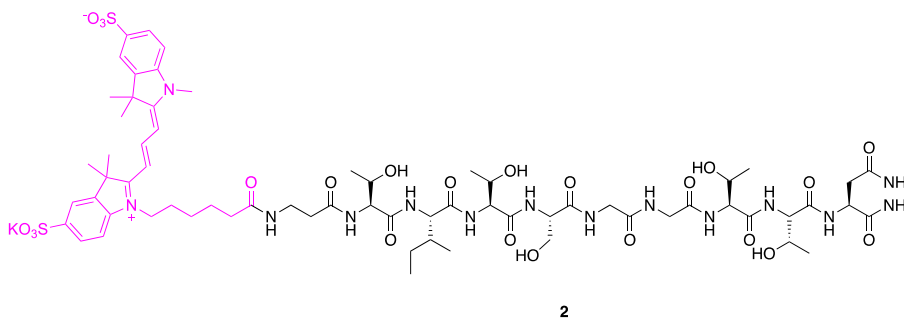

**Sequence:** SulfoCy3-β-Ala-Thr-Ile-Thr-Ser-Gly-Gly-Thr-Thr-Asn-NH<sub>2</sub>; **HPLC** (Chromolith RP-18C, 1-99% B in A over 4.5 min, flow rate = 2.8 mL/min, wavelength = 214 nm):  $t_R$  = 2.51 min (> 99% purity); **HRMS (ESI+)**  $m/z$  calc. for C<sub>66</sub>H<sub>96</sub>N<sub>14</sub>O<sub>23</sub>S<sub>2</sub>Na<sub>2</sub> [M+H]<sup>+</sup> = 1563.6088, found 1563.6031.

### Synthesis & characterization of peptide 3

The peptide was assembled on a Rink amide AM resin (0.41 mmol/g, 0.1 mmol) using the Liberty Lite™ peptide synthesizer, followed by isolation of the non-labelled precursor **8** (H-β-Ala-Asn-Ala-Arg-Arg-Leu-Arg-Glu-Tyr-Trp-NH<sub>2</sub>) by the conditions outlined above. The non-labelled precursor **8** was purified by preparative RP-HPLC using a linear gradient of 10 to 40% B in A. After lyophilization, the peptide precursor **8** was obtained under its TFA salt form as a white powder in 33% yield (59.3 mg).

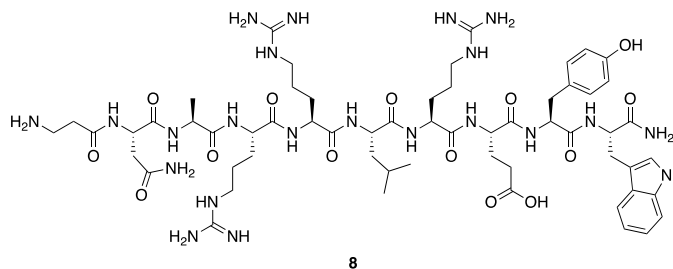

**Sequence:** H-β-Ala-Asn-Ala-Arg-Arg-Leu-Arg-Glu-Tyr-Trp-NH<sub>2</sub>; **HPLC** (Chromolith RP-18C, 1-99% B in A over 4.5 min, flow rate = 2.8 mL/min, wavelength = 214 nm):  $t_R$  = 2.51 min (99% purity); **HRMS (ESI+)**  $m/z$  calc. for C<sub>59</sub>H<sub>92</sub>N<sub>22</sub>O<sub>14</sub> [M+H]<sup>+</sup> = 1333.7241, found 1333.7321.



Subsequently, peptide **8** (18.3 mg, 0.01 mmol) was labelled using the procedure outlined above, and purified by preparative RP-HPLC using a linear gradient of 15 to 60% B in A. After lyophilization, peptide **3** was obtained under its TFA salt form as a pink powder in 83% yield (19.6 mg).

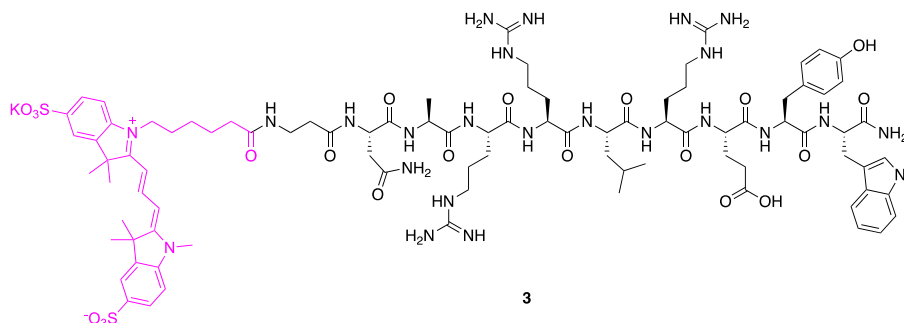

**Sequence:** SulfoCy3-β-Ala-Asn-Ala-Arg-Arg-Leu-Arg-Glu-Tyr-Trp-NH<sub>2</sub>; **HPLC** (Chromolith RP-18C, 1-99% B in A over 4.5 min, flow rate = 2.8 mL/min, wavelength = 214 nm): t<sub>R</sub> = 2.74 min (> 99% purity); **HRMS (ESI+)** m/z calc. for C<sub>89</sub>H<sub>126</sub>N<sub>24</sub>O<sub>21</sub>S<sub>2</sub> [M+2H]<sup>2+</sup> = 966.4564, found 966.4481.

## 2.4 Synthesis of cyclic peptide 6

The labelled cyclic peptide **6** was synthesized following Scheme 1 provided in the manuscript. Linear peptide precursor **4** was first assembled by SPPS on a Rink amide AM resin (0.41 mmol/g, 0.10 mmol). Fmoc-Pra-OH, Fmoc-Lys(N<sub>3</sub>)-OH and Fmoc-β-Ala-OH were manually coupled to the resin, whereas the standard amino acid residues were introduced using the Liberty Lite™ peptide synthesizer. After cleavage from the resin, precursor **4** was purified by preparative RP-HPLC using a linear gradient of 15 to 50% B in A. After lyophilization, the linear peptide precursor **4** was obtained under its TFA salt form as a white powder in 41% yield (83.9 mg).

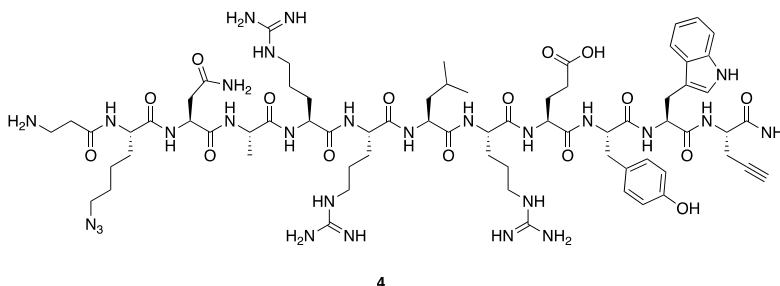

**Sequence:** H-β-Ala-Lys(N<sub>3</sub>)-Asn-Ala-Arg-Arg-Leu-Arg-Glu-Tyr-Trp-Pra-NH<sub>2</sub>; **HPLC** (Chromolith RP-18C, 1-99% B in A over 4.5 min, flow rate = 2.8 mL/min, wavelength = 214 nm): t<sub>R</sub> = 2.74 min (99% purity); **HRMS (ESI+)** m/z calc. for C<sub>70</sub>H<sub>107</sub>N<sub>27</sub>O<sub>16</sub> [M+H]<sup>+</sup> = 1582.8467, found 1582.8425.

Subsequently, peptide **4** (66.0 mg, 0.032 mmol, 1.0 equiv) was stirred in a round-bottom flask in 5 mL H<sub>2</sub>O:MeCN 1:1 and diluted with 50 mL H<sub>2</sub>O. Subsequently, copper(II) sulfate pentahydrate (26.2 mg, 0.105 mmol, 3.2 equiv), sodium ascorbate (21.4 mg, 0.108 mmol, 3.4 equiv) and ammonium hydrogencarbonate (31.4 mg, 0.324 mmol, 10.0 equiv) were each solubilized in 1 mL water and separately added to the peptide solution, followed by washing with a total of 2 mL water (final peptide concentration of 0.75 mM). After stirring the mixture for 2 hours at room temperature, it was lyophilized. The resulting green powder was solubilized in DMSO and acidified with a few drops of TFA, followed by purification by preparative RP-HPLC using a linear gradient of 10 to 50% B in A. After lyophilization, cyclic peptide **5** was obtained under its TFA salt form as a white powder in 42% yield (28.0 mg).

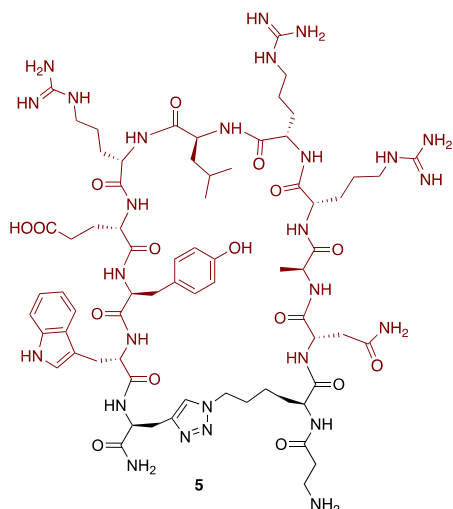

**Sequence:** H- $\beta$ -Ala-c[Lys(N<sub>3</sub>)-Asn-Ala-Arg-Arg-Leu-Arg-Glu-Tyr-Trp-Pra]-NH<sub>2</sub>; **HPLC** (Chromolith RP-18C, 1-99% B in A over 4.5 min, flow rate = 2.8 mL/min, wavelength = 214 nm):  $t_R$  = 2.48 min (99% purity); **HRMS (ESI+)** m/z calc. for C<sub>70</sub>H<sub>107</sub>N<sub>27</sub>O<sub>16</sub> [M+H]<sup>+</sup> = 1582.8467, found 1582.8425.

Subsequently, peptide **5** (18.2 mg, 0.009 mmol) was labelled using the procedure outlined above, and purified by preparative RP-HPLC using a linear gradient of 15 to 60% B in A. After lyophilization, peptide **6** was obtained as a pink powder in 86% yield (19.8 mg).

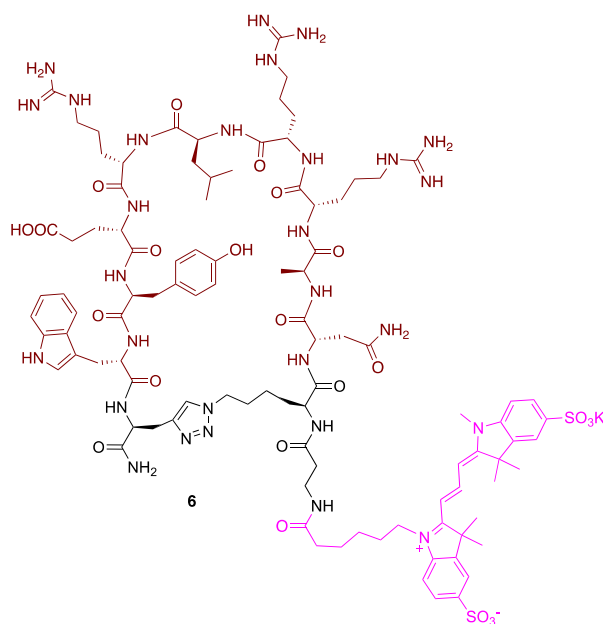

**Sequence:** SulfoCy3- $\beta$ -Ala-c[Lys(N<sub>3</sub>)-Asn-Ala-Arg-Arg-Leu-Arg-Glu-Tyr-Trp-Pra]-NH<sub>2</sub>; **HPLC** (Chromolith RP-18C, 1-99% B in A over 4.5 min, flow rate = 2.8 mL/min, wavelength = 214 nm):  $t_R$  = 2.76 min (> 99% purity); **HRMS (ESI+)** m/z calc. for C<sub>100</sub>H<sub>141</sub>N<sub>29</sub>O<sub>23</sub>S<sub>2</sub> [M+2H]<sup>2+</sup> = 1091.0177, found 1091.0271.

## 2.5 Synthesis of acetylated analogues

### Synthesis & characterization of peptide 9

The peptide was assembled on a Rink amide AM resin (0.41 mmol/g, 0.1 mmol) using the Liberty Lite™ peptide synthesizer, followed by isolation by preparative RP-HPLC using the conditions outlined above. After lyophilization, peptide **9** was obtained under its TFA salt form as a white powder in 19% yield (34 mg).

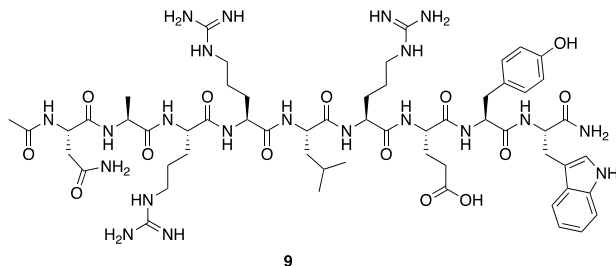

**Sequence:** Ac-Asn-Ala-Arg-Arg-Leu-Arg-Glu-Tyr-Trp-NH<sub>2</sub>; **HPLC** (Chromolith RP-18C, 1-99% B in A over 4.5 min, flow rate = 2.8 mL/min, wavelength = 214 nm):  $t_R$  = 3.08 min (98% purity); **HRMS (ESI+)**  $m/z$  calc. for C<sub>58</sub>H<sub>89</sub>N<sub>21</sub>O<sub>14</sub> [M+H]<sup>+</sup> = 1304.6975, found 1304.6998.

### Synthesis & characterization of cyclic peptide 11

The cyclic acetylated variant **11** of peptide **6** was synthesized in an analogous manner. Linear peptide precursor **10** was first assembled by SPPS on a Rink amide AM resin (0.41 mmol/g, 0.10 mmol). Fmoc-Pra-OH and Fmoc-Lys(N<sub>3</sub>)-OH were manually coupled to the resin, whereas the standard amino acid residues were introduced using the Liberty Lite™ peptide synthesizer. After cleavage from the resin, precursor **10** was purified by preparative RP-HPLC. After lyophilization, the linear peptide precursor **10** was obtained under its TFA salt form as a white powder in 44% yield (85 mg).

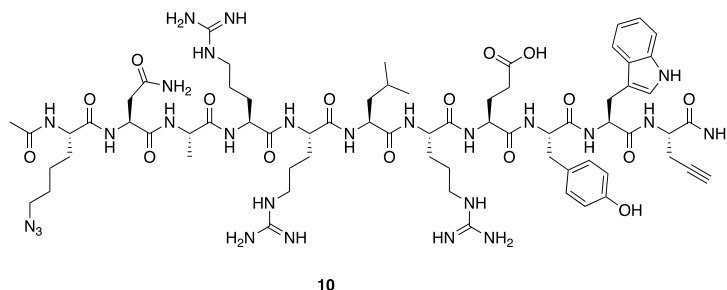

**Sequence:** Ac-Lys(N<sub>3</sub>)-Asn-Ala-Arg-Arg-Leu-Arg-Glu-Tyr-Trp-Pra-NH<sub>2</sub>; **HPLC** (Chromolith RP-18C, 1-99% B in A over 4.5 min, flow rate = 2.8 mL/min, wavelength = 214 nm):  $t_R$  = 2.84 min (97% purity); **HRMS (ESI+)**  $m/z$  calc. for C<sub>69</sub>H<sub>104</sub>N<sub>26</sub>O<sub>16</sub> [M+H]<sup>+</sup> = 1553.8202, found 1553.8265.

Subsequently, peptide **10** (83.7 mg, 0.041 mmol, 1.0 equiv) was stirred in a round-bottom flask in 5 mL H<sub>2</sub>O:MeCN 1:1 and diluted with 70 mL H<sub>2</sub>O. Subsequently, copper(II) sulfate pentahydrate (40.1 mg, 0.161 mmol, 3.9 equiv), sodium ascorbate (28.2 mg, 0.142 mmol, 3.5 equiv) and ammonium hydrogencarbonate (42.0 mg, 0.531 mmol, 13.0 equiv) were each solubilized in 1 mL water and separately added to the peptide solution, followed by washing with a total of 2 mL water (final peptide concentration of 0.75 mM). After stirring the mixture for 1 hour at room temperature, it was lyophilized. The resulting green powder was solubilized in DMSO and acidified with a few drops of TFA, followed by purification by preparative RP-HPLC. After lyophilization, cyclic peptide **11** was obtained under its TFA salt form as a white powder in 52% yield (43 mg).

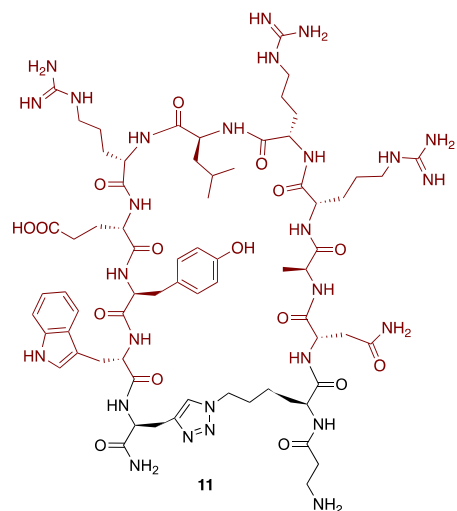

**Sequence:** Ac-c[Lys(N<sub>3</sub>)-Asn-Ala-Arg-Arg-Leu-Arg-Glu-Tyr-Trp-Pra]-NH<sub>2</sub>; **HPLC** (Chromolith RP-18C, 1-99% B in A over 4.5 min, flow rate = 2.8 mL/min, wavelength = 214 nm): **t<sub>R</sub>** = 2.58 min (99% purity); **HRMS (ESI+)** m/z calc. for C<sub>69</sub>H<sub>104</sub>N<sub>26</sub>O<sub>16</sub> [M+H]<sup>+</sup> = 1553.8202, found 1553.8298.

## 2.6 Copies of HPLC spectra

Spectra were recorded on an analytical HPLC (VWR) equipped with a Chromolith High Resolution RP-18C column from Merck (150 mm x 4.6 mm, 1.1  $\mu$ m). Product were eluted using a linear gradient ranging from 1% to 99% B over 4.5 minutes at a flow rate of 2.8 mL/min.

### Peptide 1

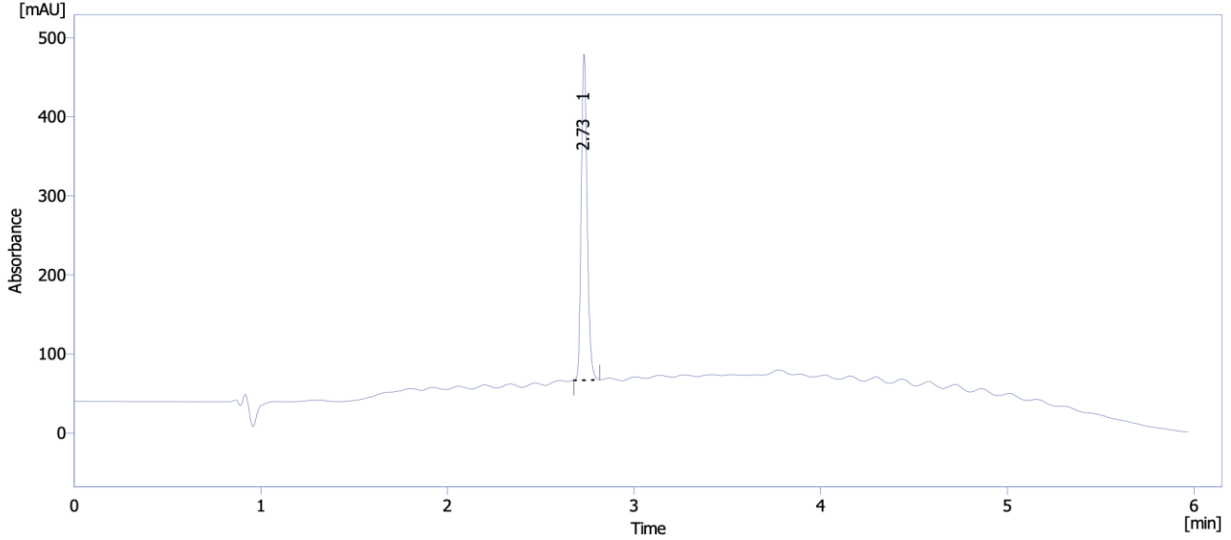

Result Table (Uncal - MM72 SulfoCy3 Pure\_11\_17\_2022 4\_24\_28 PM\_023 - PDA1-214nm-at-4nm)

|   | Compound Name | Reten. Time [min] | Area [mAU.s] | Height [mAU] | Area [%] | Height [%] |
|---|---------------|-------------------|--------------|--------------|----------|------------|
| 1 |               | 2.730             | 908.467      | 412.406      | 100.0    | 100.0      |
|   |               | Total             | 908.467      | 412.406      | 100.0    | 100.0      |

### Peptide 2

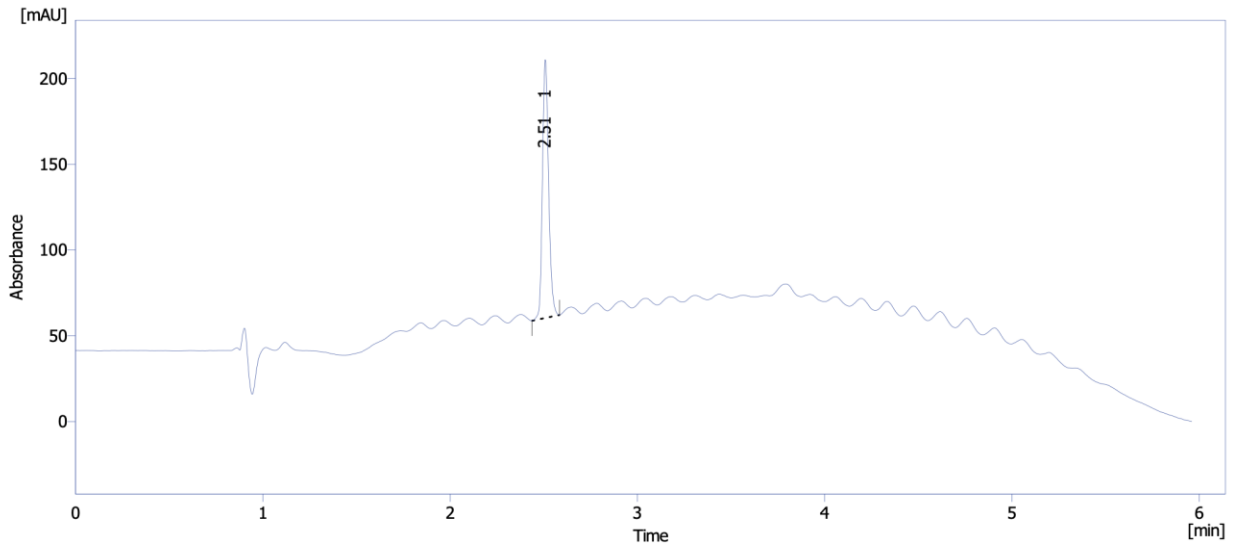

Result Table (Uncal - MM71 SulfoCy3 Pure\_11\_10\_2022 1\_28\_13 PM\_010 - PDA1-214nm-at-4nm)

|   | Compound Name | Reten. Time [min] | Area [mAU.s] | Height [mAU] | Area [%] | Height [%] |
|---|---------------|-------------------|--------------|--------------|----------|------------|
| 1 |               | 2.507             | 344.020      | 150.576      | 100.0    | 100.0      |
|   |               | Total             | 344.020      | 150.576      | 100.0    | 100.0      |

### Peptide 3

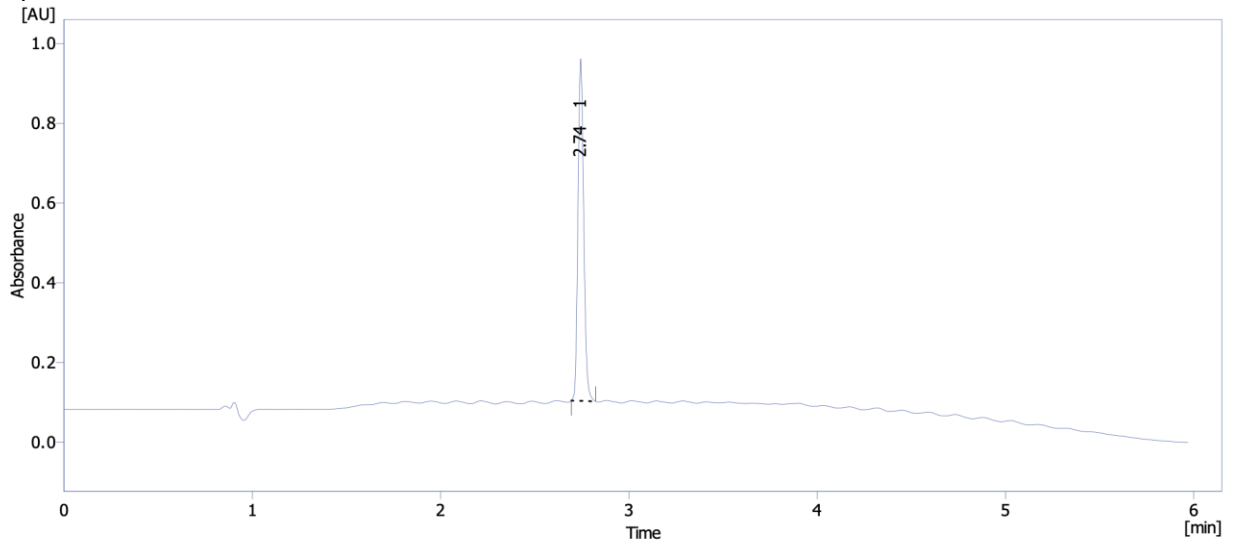

Result Table (Uncal - C:\Clarity VA\DataFiles\orgc\Data\KVH\KVH347-pure\_9\_13\_2021 9\_25\_56 AM\_007 - PDA1-214nm-at-4nm)

|   | Compound Name | Reten. Time [min] | Area [mAU.s] | Height [mAU] | Area [%] | Height [%] |
|---|---------------|-------------------|--------------|--------------|----------|------------|
| 1 |               | 2.743             | 1819.851     | 857.742      | 100.0    | 100.0      |
|   |               | Total             | 1819.851     | 857.742      | 100.0    | 100.0      |

### Peptide 4

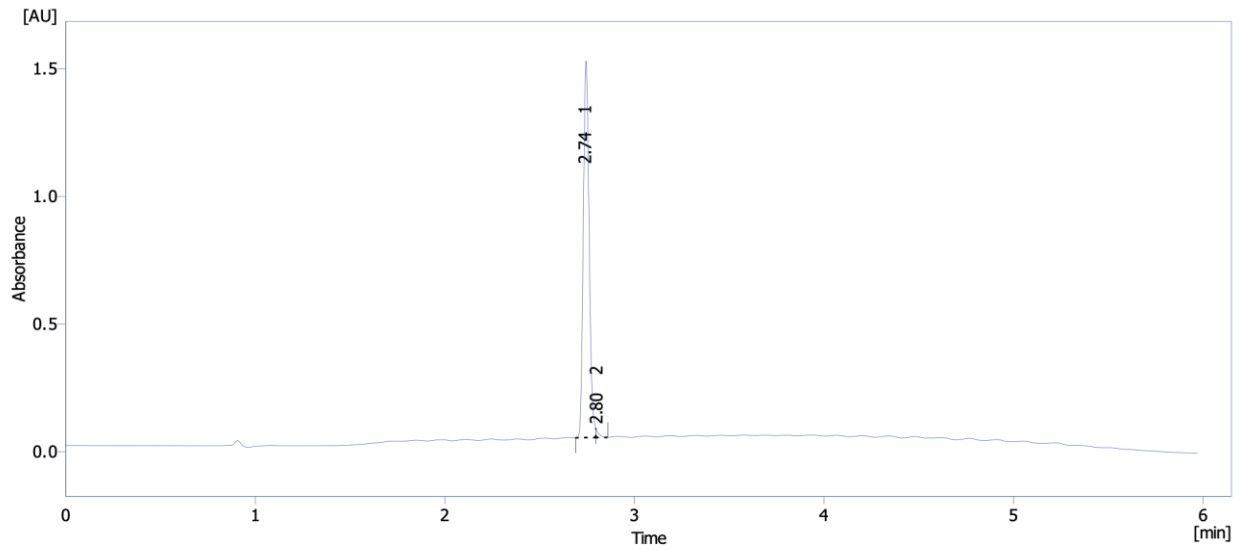

Result Table (Uncal - KVH354B-i2-f8\_10\_12\_2021 10\_34\_46 AM\_012 - PDA1-214nm-at-4nm)

|   | Compound Name | Reten. Time [min] | Area [mAU.s] | Height [mAU] | Area [%] | Height [%] |
|---|---------------|-------------------|--------------|--------------|----------|------------|
| 1 |               | 2.743             | 3154.512     | 1475.673     | 98.9     | 98.4       |
| 2 |               | 2.803             | 36.534       | 23.578       | 1.1      | 1.6        |
|   |               | Total             | 3191.046     | 1499.251     | 100.0    | 100.0      |

### Peptide 5

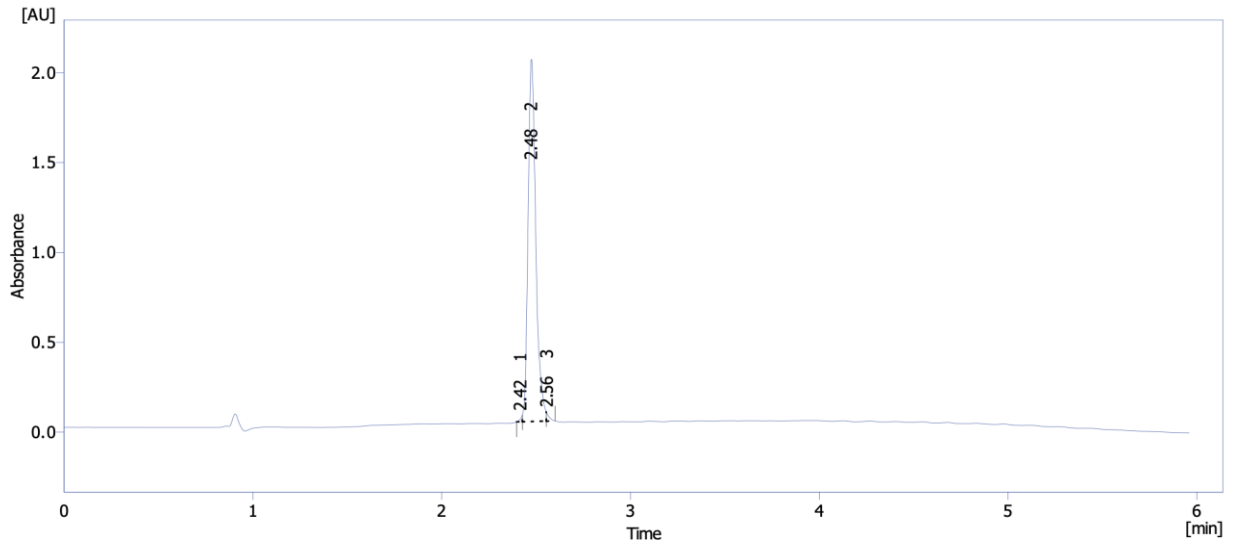

Result Table (Uncal - KVH356-i2-f2\_10\_19\_2021 9\_35\_11 AM\_007 - PDA1-214nm-at-4nm)

|   | Compound Name | Reten. Time [min] | Area [mAU.s] | Height [mAU] | Area [%] | Height [%] |
|---|---------------|-------------------|--------------|--------------|----------|------------|
| 1 |               | 2.420             | 19.019       | 21.059       | 0.3      | 1.0        |
| 2 |               | 2.477             | 5744.554     | 2015.426     | 98.7     | 97.2       |
| 3 |               | 2.560             | 54.819       | 36.856       | 0.9      | 1.8        |
|   | Total         |                   | 5818.392     | 2073.341     | 100.0    | 100.0      |

### Peptide 6

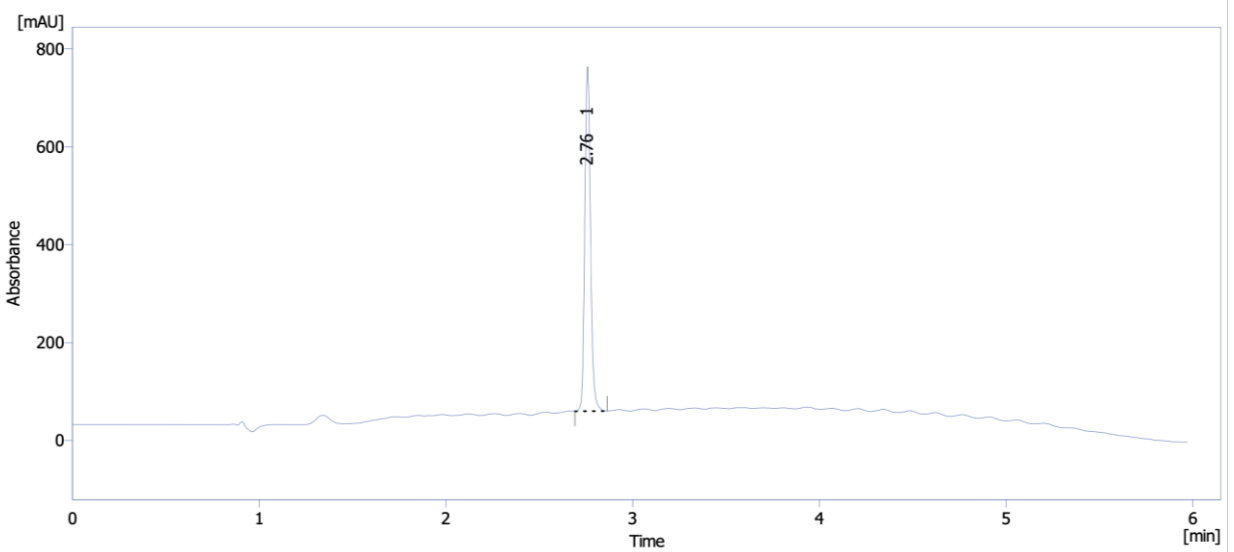

Result Table (Uncal - KVH374-pure\_10\_25\_2021 3\_29\_29 PM\_022 - PDA1-214nm-at-4nm)

|   | Compound Name | Reten. Time [min] | Area [mAU.s] | Height [mAU] | Area [%] | Height [%] |
|---|---------------|-------------------|--------------|--------------|----------|------------|
| 1 |               | 2.757             | 1498.560     | 704.055      | 100.0    | 100.0      |
|   | Total         |                   | 1498.560     | 704.055      | 100.0    | 100.0      |

### Peptide 7

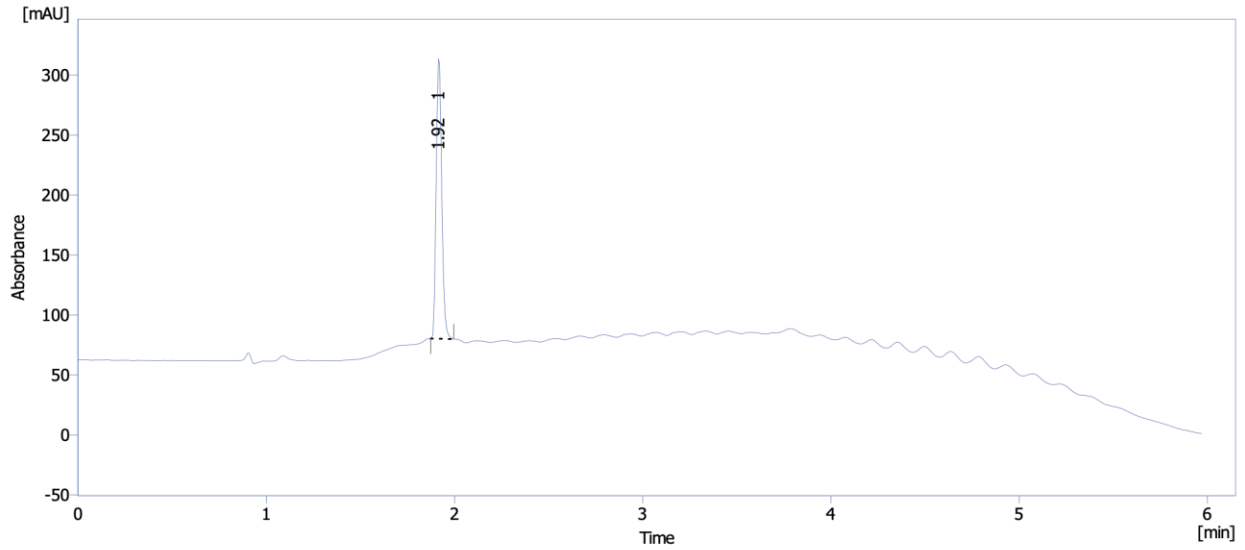

Result Table (Uncal - MM74 P1B NU\_12\_7\_2022 10\_59 AM\_019 - PDA1-214nm-at-4nm)

|   | Compound Name | Reten. Time [min] | Area [mAU.s] | Height [mAU] | Area [%] | Height [%] |
|---|---------------|-------------------|--------------|--------------|----------|------------|
| 1 |               | 1.917             | 479.486      | 233.261      | 100.0    | 100.0      |
|   |               | Total             | 479.486      | 233.261      | 100.0    | 100.0      |

### Peptide 8

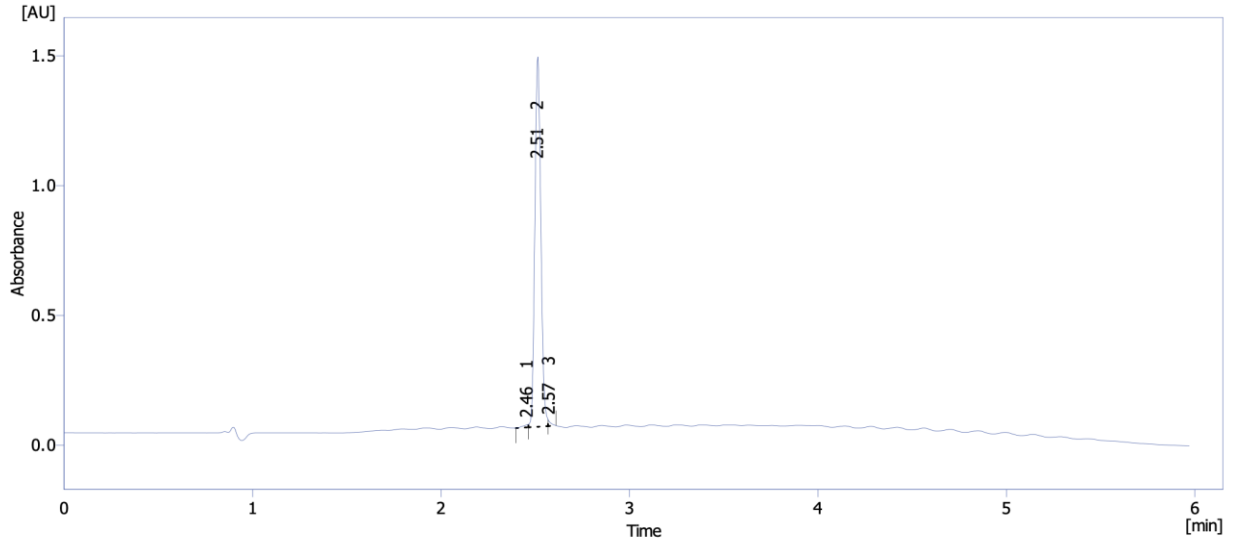

Result Table (Uncal - C:\ClarityVA\DataFiles\orgcl\Data\KVH\KVH343-pure-Iyo\_9\_8\_2021 2\_23\_07 PM\_027 - PDA1-214nm-at-4nm)

|   | Compound Name | Reten. Time [min] | Area [mAU.s] | Height [mAU] | Area [%] | Height [%] |
|---|---------------|-------------------|--------------|--------------|----------|------------|
| 1 |               | 2.457             | 19.060       | 10.118       | 0.6      | 0.7        |
| 2 |               | 2.513             | 3149.651     | 1424.166     | 98.6     | 98.1       |
| 3 |               | 2.573             | 26.089       | 17.349       | 0.8      | 1.2        |
|   |               | Total             | 3194.800     | 1451.633     | 100.0    | 100.0      |



Peptide 9

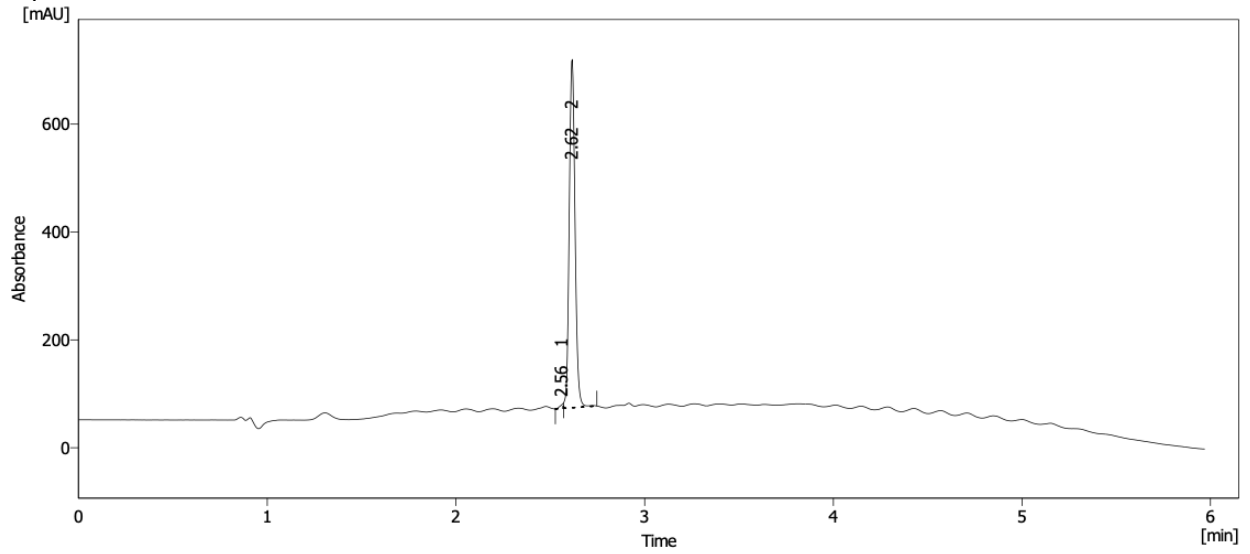

Result Table (Uncal - KVH544-pure\_8\_1\_2022 11\_52\_24 AM\_020 - PDA1-214nm-at-4nm)

|   | Compound Name | Reten. Time [min] | Area [mAU.s] | Height [mAU] | Area [%] | Height [%] |
|---|---------------|-------------------|--------------|--------------|----------|------------|
| 1 |               | 2.563             | 9.038        | 7.579        | 0.7      | 1.2        |
| 2 |               | 2.617             | 1378.720     | 645.589      | 99.3     | 98.8       |
|   | Total         |                   | 1387.758     | 653.168      | 100.0    | 100.0      |

Peptide 10

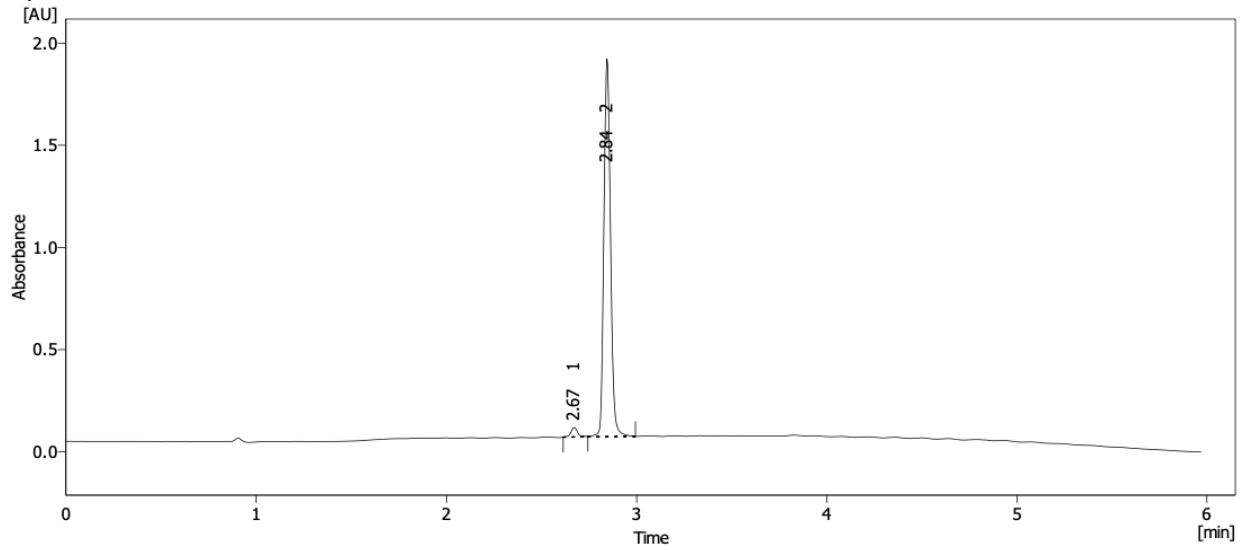

Result Table (Uncal - KVH541-f3 new vial\_7\_18\_2022 9\_31\_01 AM\_005 - PDA1-214nm-at-4nm)

|   | Compound Name | Reten. Time [min] | Area [mAU.s] | Height [mAU] | Area [%] | Height [%] |
|---|---------------|-------------------|--------------|--------------|----------|------------|
| 1 |               | 2.670             | 112.972      | 46.862       | 2.5      | 2.5        |
| 2 |               | 2.843             | 4489.813     | 1849.525     | 97.5     | 97.5       |
|   | Total         |                   | 4602.785     | 1896.387     | 100.0    | 100.0      |

Peptide 11

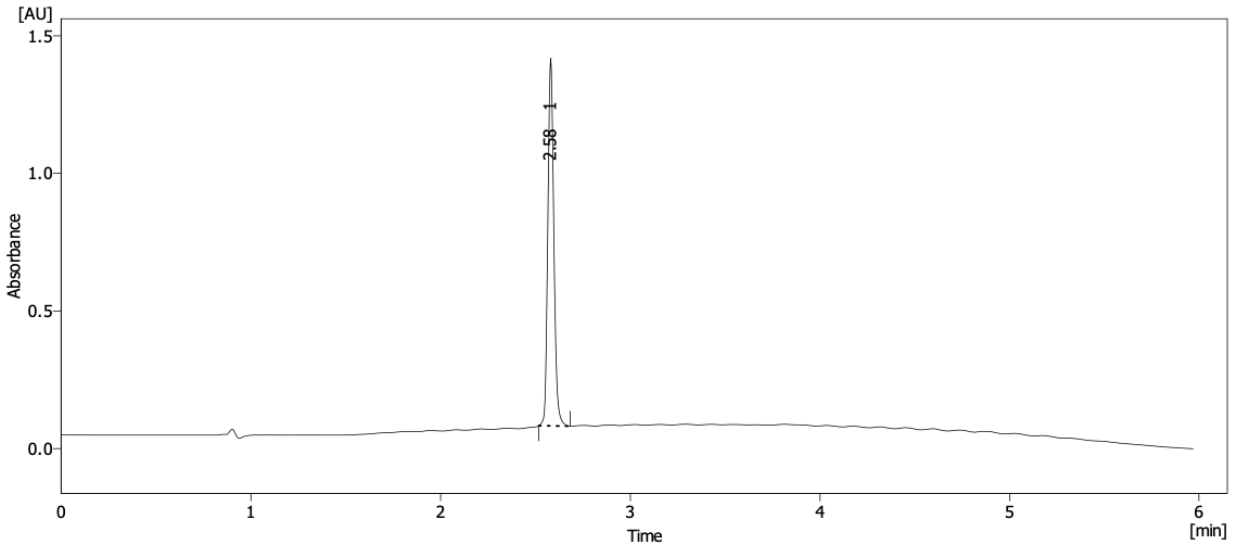

Result Table (Uncal - KVH553-f1\_7\_25\_2022 9\_39\_28 AM\_002 - PDA1-214nm-at-4nm)

|   | Compound Name | Reten. Time [min] | Area [mAU.s] | Height [mAU] | Area [%] | Height [%] |
|---|---------------|-------------------|--------------|--------------|----------|------------|
| 1 |               | 2.580             | 2942.695     | 1336.151     | 100.0    | 100.0      |
|   |               | Total             | 2942.695     | 1336.151     | 100.0    | 100.0      |

## 2.7 Proteolytic stability

Proteolytic stability was assessed using an *in vitro* human plasma stability assay. First, lyophilized peptides **9** and **11** were dissolved in milliQ water (2mM stock solution) and consecutive dilutions were prepared. Assessment of the linearity, accuracy and precision of the method have been validated using 3 independent calibration curves. Stability experiments have been performed in duplicate. Frozen human plasma samples (from the Belgian Red Cross (Vlaams-Brabant, Mechelen)) were thawed and heated to 37°C in an incubator for at least 30 min. Then peptide solutions (1.12 mM) were spiked in human plasma (10:90 v/v peptide solution/plasma). Samples of 100 µL were taken at different time points, depending on the peptide stability, and 300 µL of cold (4°C) precipitation solvent (methanol containing 0.1% TFA v/v) was added, allowing a protein crash. The resulting suspensions were vortexed (2000 x g) for 15 s and placed at 4°C for 30 min. After centrifugation for 15 min, 100 µL supernatant was diluted with 100 µL water in the injection vial. Sample analysis was performed using an Agilent 1200 series gradient HPLC system in combination with an EC HPLC column EC 150/2 NUCLEODUR (C18 HTec, 150 mm x 2 mm, 3 µm, Macherey-Nagel). The half-life of the peptides was calculated by interpolating the data based on the calibration curves. Concentrations were calculated by use of the calibration curve and transferred to a semi-log chart presenting the log concentrations as a function of time. The optimum curve was used to calculate the peptide half-life. Data analysis was performed using Microsoft® Office 365 Excel.

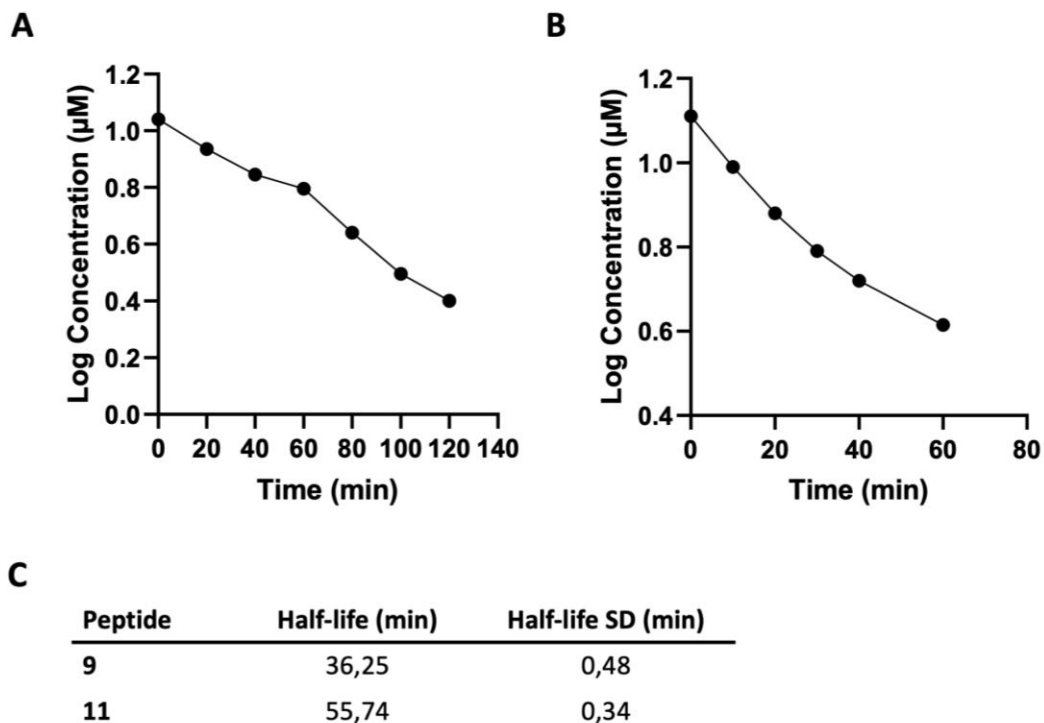

**Figure S4. Proteolytic stability of acetylated analogues of peptides 3 and 6.** The semi-log charts of peptide **9** (A) and **11** (B) are shown. These were used to calculate their peptide half-life (C).

## 2.8 Cytotoxicity on living *A. baumannii* cells

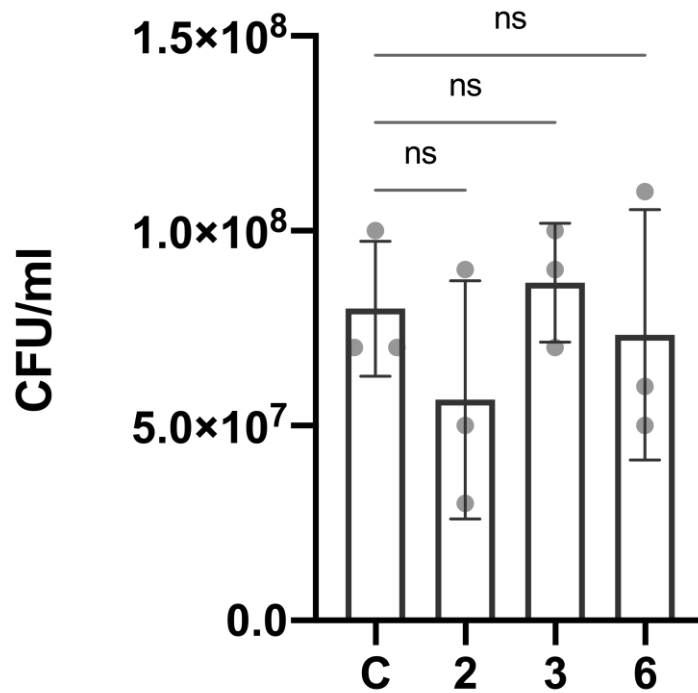

**Figure S5. Peptide cytotoxicity on living AB5075-VUB.** Colony forming units (CFU) of AB5075-VUB were compared after 30 min incubation with peptides 2, 3 and 6 or buffer only (C). No statistically significant difference between the peptides and the control was observed. Statistics were tested by a one-way ANOVA test using Graphpad Prism software.

### 3 Quantification labelled cells

|                                   | <b>BR1</b> | <b>BR2</b> | <b>BR3</b> |
|-----------------------------------|------------|------------|------------|
| <b>Phase contrast (all cells)</b> | 571        | 344        | 297        |
| <b>SulfoCy3 (labelled cells)</b>  | 22         | 9          | 7          |
| <b>Percentage labelled</b>        | 3,85%      | 2,62%      | 2,36%      |
| <b>Average (%)</b>                | 2,94%      |            |            |
| <b>SD (%)</b>                     | 0,65%      |            |            |

**Table S1.** Quantification of AB5075-VUB cells labelled by SulfoCy3-labelled NbD4. BR= Biological Replicate.

## 4 References

(1) Lefranc, M.-P.; Pommié, C.; Riuz, M.; Giudicelli, V.; Foulquier, E.; Truong, L.; Thouvenin-Contet, V.; Lefranc, G. IMGT unique numbering for immunoglobulin and T cell receptor variable domains and Ig superfamily V-like domains. *Dev. Comp. Immunol.* **2003**, *27*, 55-77.

(2) Dunbar, J.; Deane, C. M. ANARCI: antigen receptor numbering and receptor classification. *Bioinformatics* **2016**, *32* (2), 298-300.
